# Supplementary material
Source: PubMed Central journal article supplement (PMC5270642)
Supplement: ja6b03462_si_001.pdf [file ja6b03462_si_001.pdf]

# **Supporting Information**

## **Convergent Mechanistic Features between the Structurally Diverse N- and O-Methyltransferases: Glycine N-Methyltransferase and Catechol O-Methyltransferase**

Jianyu Zhang and Judith P. Klinman

**Scheme S1** Conversion between open and closed conformations for dimer structures of rat GNMT in the presence of AdoMet and acetate.<sup>1</sup> Residues 1-23 are shown in blue and red in each subunit (cyan and yellow) illustrated in cartoon. AdoMet and acetate are presented in sticks with C(green), N(blue), O(red) and S(yellow). (a) apo-GNMT, open and inactive conformation, PDB:1BHJ;<sup>2</sup> (b) Binary complex with R175K GNMT and AdoMet, the residue 1-17 is not shown for the immobile position in crystal structure. PDB:1NBI; (c) Ternary complex with GNMT, AdoMet and acetate. PDB:1NBH.

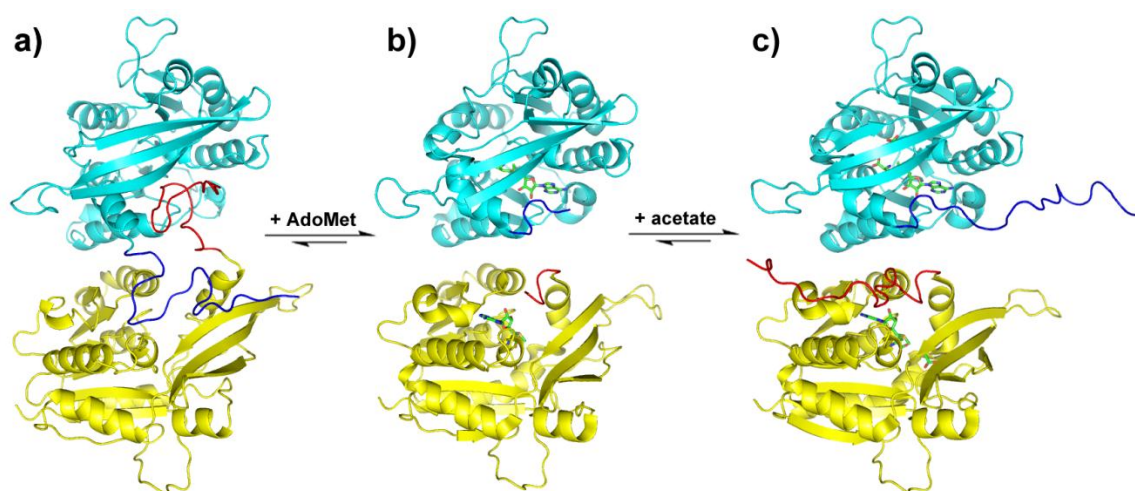

**Figure S1** Relationship between the  $k_{\text{cat}}/K_m$  for AdoMet and  $2^\circ$  KIE for methylation of Glycine by the Recombinant Rat GNMT and Y21 mutants.

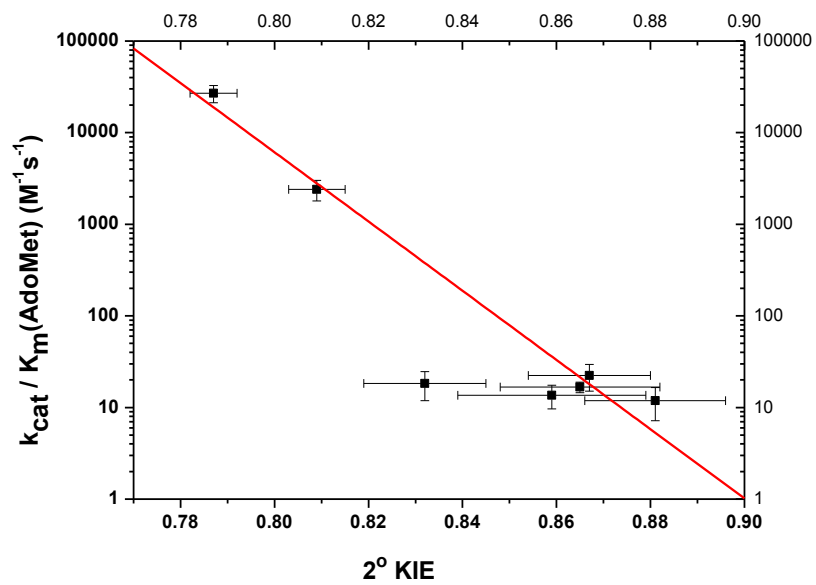

**Figure S2** Using the ternary complex of GNMT with acetate as a model, the carboxylate group of substrate is expected to be anchored by hydrogen bond interactions with Tyr33, Asn138, Arg175 and Tyr220.

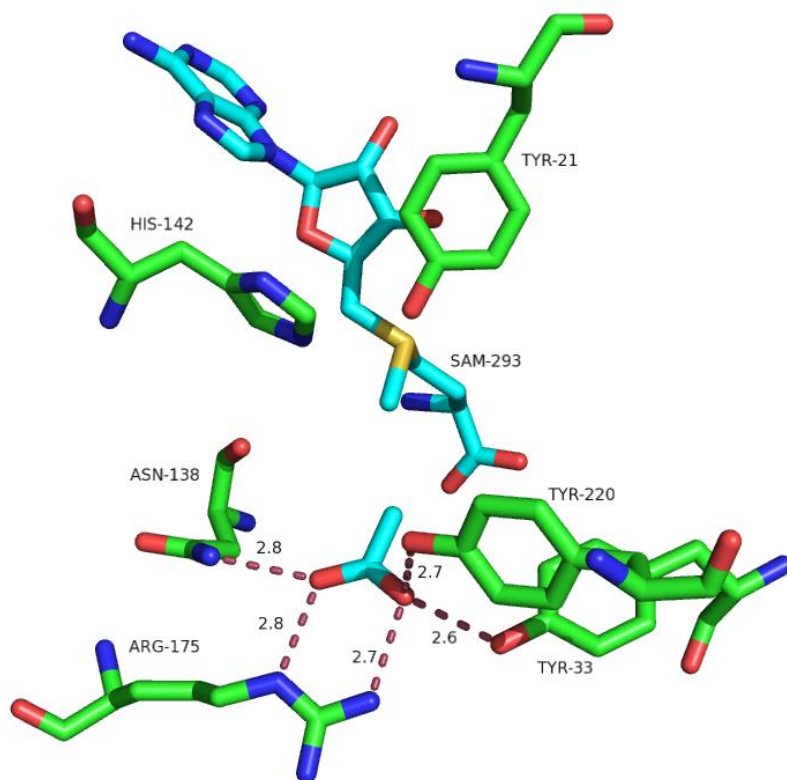

**Fig S3** Schematic diagram showing the interaction of glycine (in green) in the active site of GNMT (PDB: 1NBH with glycine docking in the active site).

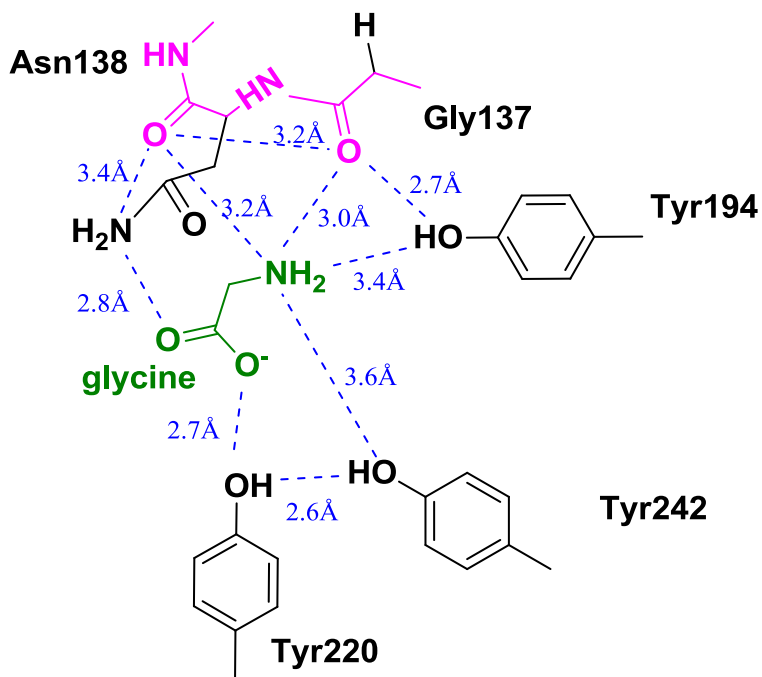

**Fig S4** Active site of COMT.

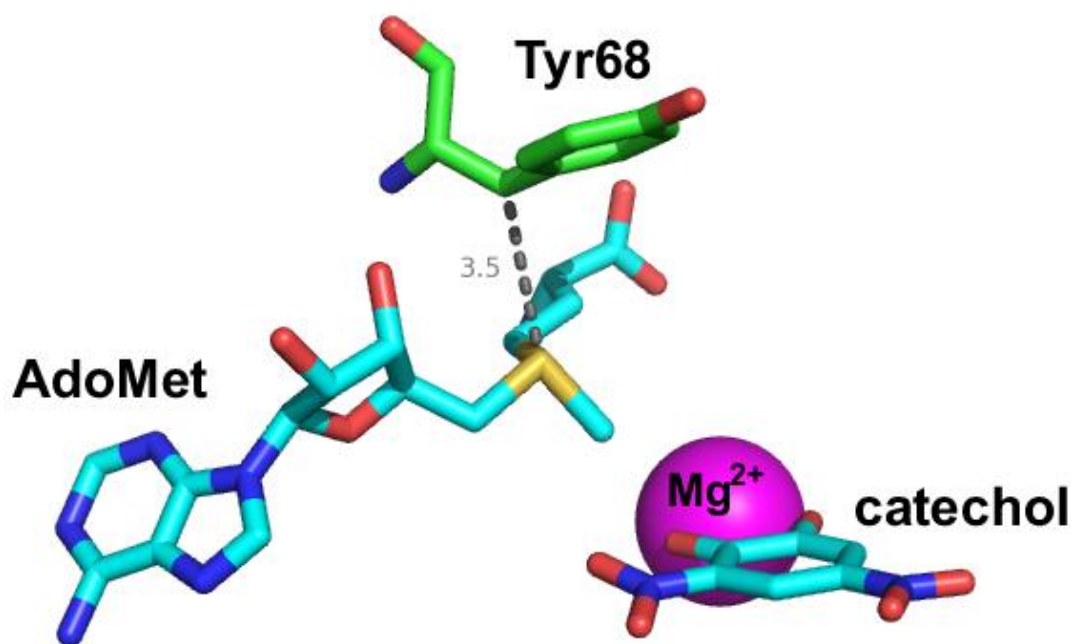

**References:**

- (1) Takata, Y.; Huang, Y. F.; Komoto, J.; Yamada, T.; Konishi, K.; Ogawa, H.; Gomi, T.; Fujioka, M.; Takusagawa, F. *Biochemistry* **2003**, *42*, 8394.
- (2) Pattanayek, R.; Newcomer, M. E.; Wagner, C. *Protein Science* **1998**, *7*, 1326.
